# Supplementary material
Source: PubMed Central journal article supplement (PMC7096003)
Supplement: 41591_2016_BFnm4131_MOESM55_ESM.pdf [file 41591_2016_BFnm4131_MOESM55_ESM.pdf]

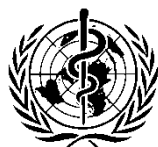

**WHO Consultation on MERS CoV R&D:  
Development of a Global MERS CoV R&D Roadmap – Salle A**

**10-11 December 2015,**

**LIST OF PARTICIPANTS**

***PARTICIPANTS:***

**Mohammed Al-Hajri**, Director, Emergency Preparedness and Response, Supreme Council of Health, **Qatar**

**Hail Mater Alabdely**, Director-General, Health Facilities Infection Control, Ministry of Health, Riyadh, **Saudi Arabia**

**Abdullah Mufareh Assiri**, Assistant Deputy Minister Preventive Health, Ministry of Health, Riyadh, **Saudi Arabia**

**Abdulaziz Bin Saeed**, Deputy Minister of Health, Ministry of Health, Riyadh, **Saudi Arabia**

**Simon Cauchemez**, Imperial College London, **United Kingdom of Great Britain & Northern Ireland**

**Christoph Conrad**, Scientist, Major Policy Issues, International Relations, **Paul-Ehrlich-Institut**, Langen, **Germany**

**Christian Drosten**, Institute of Virology, University of Bonn, **Germany**

**Moulay Ahmed El Idrissi Hamzi**, Food and Agriculture Organization of the United Nations, Rome, **Italy**

**Luis Enjuanes**, Coronavirus Laboratory Head, Centro Nacional de Biotecnología, Madrid, **Spain**

**Matt Freiman**, University of Maryland School of Medicine, Baltimore, **United States of America**

**Andrea Gambotto**, Assistant Professor, University of Pittsburgh, School of Medicine, **United States of America**

**Barney S. Graham, Deputy Director**, Chief, Viral Pathogenesis Laboratory and Translational Science Core, Vaccine Research Center, NIAID, NIH, Bethesda, **United States of America**

**Bart Haagmans**, Erasmus Medical Centre, Rotterdam, **Netherlands**

**Ruth Harvey**, Scientist, Department of Virology, National Institute for Biological Standards and Control, Health Protection Agency, Potters Bar, **United Kingdom of Great Britain & Northern Ireland**

**Frederick Hayden**, Professor of Clinical Virology, Division of Infectious Diseases and International Health, University of Virginia School of Medicine, Charlottesville, **United States of America**

**Ahmad Salah Hersi**, Chairman, Scientific Advisory Board, Ministry Of Health, Riyadh, **Saudi Arabia**

**David Kaslow**, Vice President, Product Development, PATH, Seattle, **United States of America**

**Youngmee Jee**, Director, Center for Immunology and Pathology, Centre for Disease Control and Prevention, Seoul, **Republic of Korea**

**Kent Tseng Chien-Te**, Associate Professor, Department of Microbiology and Immunology Director, SARS and MERS P3 laboratories Member, Center of, Galveston, Texas, **United States of America**

**Jerome H. Kim**, Director General, International Vaccine Institute, Seoul, **Republic of Korea**

**Marion Koopmans**, Erasmus Medical Centre, Rotterdam, **Netherlands**

**John Lowenthal**, Research Director, Emerging Infectious Diseases, CSIRO Animal Health Laboratory, Victoria, **Australia**

**Wayne Marasco**, Harvard Medical School, Boston, MA, **United States of America**

**Kayvon Modjarrad**, US Military HIV Research Program, Walter Reed Army Institute of Research, Rockville, **United States of America**

**Michael Muhleback**, Veterinary Medicine, Paul Ehrlich Institute, Langen, **Germany**

**Myoung-don Oh**, Department of Internal Medicine, National University College of Medicine, Seoul, **Republic of Korea**

**Grounalan Pavade**, World Organization for Animal Health (OIE), Paris, **France**

**Eric Pelfrene**, Anti-Infectives and Vaccines, European Medicines Agency, London, **United Kingdom of Great Britain & Northern Ireland**

**Gerd Sutter**, Professor and Chair for Virology, Institute for Infectious Diseases and Zoonoses Ludwig-Maximilians-Universität, München, **Germany**

**Wenjie Tan**, China CDC, **People's Republic of China**

**Maria Van Kerkhove**, Center for Global health, Institut Pasteur, Paris

**Linqi Zhang**, Department of Basic Medical Sciences, Tsinghua University, **People's Republic of China**

***OBSERVERS:***

**Rick Bright**, Director - Influenza Division, Biomedical Advanced Research & Development Authority (BARDA), **US Department of Health and Human Services (HHS)**, Washington, **United States of America**

**Tomas Cihlar**, Senior Director of Biology, Foster City, California, **United States of America**

**Davide Corti**, CSO, Humabs BioMed SA, Bellinzona, **Switzerland**

**James Cummings**, Director, Emerging Infectious Diseases, Novavax, Maryland, **United States of America**

**Mary Kosinski**, BARDA Chief of Staff, U.S. Department of Health and Human Services, Washington, **United States of America**

**Joel Maslow**, Chief Medical Officer, GeneOne Life Science Inc, Seoul, **Republic of Korea**

**Young Park**, President & CEO, GeneOne Life Science, Inc., Seoul, **Republic of Korea**

**Nadia Passini**, Project Manager, Humabs BioMed SA, Bellinzona, **Switzerland**

**Patrick Rambaud**, President and CEO, Organic Vaccines, Dublin, **Ireland**

**Robin Robinson**, Director, Biomedical Advanced Research and Development Authority, Deputy Assistant Secretary for Preparedness, Washington, **United States of America**

**Uwe Staerz**, Chief Scientist, Geffex Inc., Aurora, **United States of America**

**Erik Stemmy**, Human Coronavirus Research Program Officer, DMID/NIAID, Rockville, Maryland, **United States of America**

**Eddie Sullivan**, President/CEO, SAB Biotherapeutics, INC., Sioux Falls, **United States of America**

**Anton Tikhonov**, Organic Vaccines, Dublin, **Ireland**

**Birgit Van Tongelen**, DG Research & Innovation, European Commission, Brussels, **Belgium**

**Sebastian Wanless**, Chief Medical Officer, Brighton Biotech, Princeton, New Jersey, **United States of America**

**In-Kyu Yoon**, International Vaccine Institute, Seoul, **Republic of Korea**

## **WHO/HQ SECRETARIAT**

**Marie-Paule Kieny**, Assistant Director-General, Health Systems & Innovation Cluster

**Sylvie Briand**, Director, Pandemic and Epidemic Diseases Department

**Vasee Moorthy**, WHO Blueprint Team, & Team Leader, Vaccine Development, Department of Immunization, Vaccines & Biologicals

**Peter Ben Embarek**, MERS-CoV Taskforce manager, Department of Food Safety and Zoonoses

**Peter Beyer**, Senior Advisor, Department of Essential Medicines

**Bernadette Murgue**, WHO Blueprint Facilitator, Health Systems & Innovation Cluster

**Cathy Roth**, Advisor, Office of the Assistant Director-General, Health Systems and Innovation Cluster

**Tony Stewart**, Global Outbreak and Response Network

**David Wood**, Coordinator, Norms and Standards, Department of Essential Medicines
